# Supplementary material for: Improved ternary memory performance of donor–acceptor structured molecules through cyano substitution
Source: Royal Society of Chemistry journal article supplement (doi:10.1039/c5tc00839e), 2015-01-01
Supplement: c5tc00839e1.pdf [file c5tc00839e1.pdf]

## Supplementary Information

### Improved ternary memory performance of donor-acceptor structured molecules through cyano substitution

Qijian Zhang, Hao Zhuang, Jinghui He, Shugang Xia, Hua Li,\* Najun Li, Qingfeng Xu and Jianmei Lu\*

#### Contents

- (1) **Scheme S1** Synthesis scheme and molecular structures of the intermediates.
- (2) Detailed experimental procedures of the intermediates.
- (3) **Fig. S1-S2**  $^1\text{H}$  NMR spectra of DPHCANA and DPCNCANA.
- (4) **Fig. S3** The prototype and SEM of the sandwich-structured memory device.
- (5) **Fig. S4-S5** IR absorbance spectra of DPHCANA and DPCNCANA in solution and film states.
- (6) **References.**

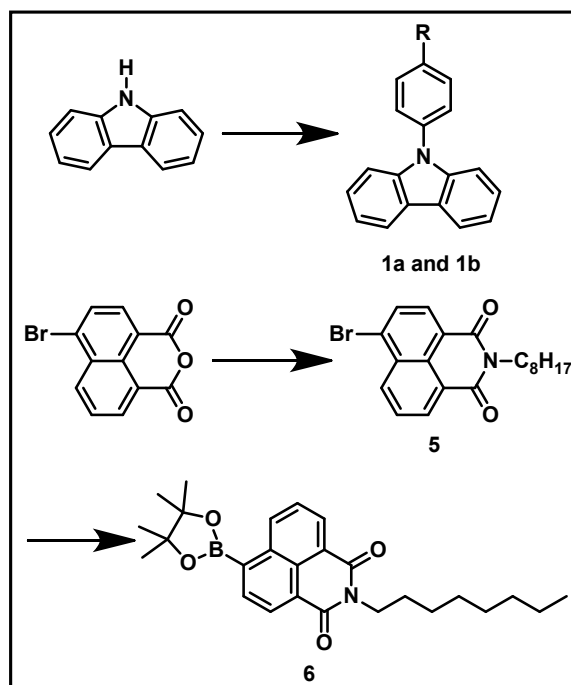

**Scheme S1.** Synthesis routes and molecular structures of the intermediates.

The two original compounds 9-phenyl-carbazole (1a), 4-(9H-carbazol-9-yl)benzonitrile (1b), 4-(4,4,5,5-tetramethyl-1,3,2-dioxaborolan-2-yl)-N-octyl-1,8-naphthalimide (6) were prepared according to previously reported procedures.<sup>1-3</sup>

**Synthesis 2:** Compound 2 was synthesized by the oxidative coupling reaction. To a 1000mL round flask were placed Iron (III) chloride (10.7 g, 66.0 mmol) and CH<sub>2</sub>Cl<sub>2</sub> (400 mL) under N<sub>2</sub>. To this mixture was very slowly added a solution of compound 1 (16.4 mmol) in CH<sub>2</sub>Cl<sub>2</sub> (200 mL). The mixture was stirred at room temperature for 5 hour. After 10% sodium hydroxide solution was added in the mixture, the aqueous solution was thoroughly extracted with CH<sub>2</sub>Cl<sub>2</sub>. Then the crude product was dissolved in CH<sub>2</sub>Cl<sub>2</sub> (10 mL) and reprecipitated slowly in methanol (400 mL). The product was collected by filtration and dried under vacuum at room temperature.

**Compound 2a:** yield 82%, white powder, <sup>1</sup>H NMR (400 MHz, CDCl<sub>3</sub>) δ 8.38 (s, 2H), 8.35 (d, 2H), 7.76 (d, 2H), 7.62 (d, 4H), 7.57 (d, 4H), 7.49 (m, J = 5.6 Hz, 6H), 7.29 (d, 2H), 7.25 (d, 2H).

**Compound 2b:** yield 80%, white powder, <sup>1</sup>H NMR (400 MHz, CDCl<sub>3</sub>) δ 8.45 (s, 2H), 8.24 (d, 2H), 7.94 (d, 4H), 7.80 (d, 6H), 7.56 (d, 2H), 7.50 (d, 4H), 7.38 (t, 2H).

**Synthesis 3:** compound 2 (6.0 mmol), NBS (2.3 g, 12.6 mmol) were added to 250 mL of CHCl<sub>3</sub> solution. The mixture was stirred at room temperature in dark for 12 h. The product was isolated by silicagel column chromatography using CH<sub>2</sub>Cl<sub>2</sub>: Hexane (v:v/1:5) as the eluent afford white solid.

**Compound 3a:** yield 91%, white powder, <sup>1</sup>H NMR (400 MHz, CDCl<sub>3</sub>) δ 8.39 (s, 2H), 8.36 (s, 2H), 7.78 (d, J = 8.5 Hz, 2H), 7.65 (t, J = 7.6 Hz, 4H), 7.58 (d, J = 7.3 Hz, 4H), 7.50 (d, J = 8.2 Hz, 6H), 7.31 (d, J = 8.7 Hz, 2H).

**Compound 3b:** yield 84%, white powder, <sup>1</sup>H NMR (400 MHz, DMSO) δ 8.82 (s, 2H), 8.65 (s, 2H), 8.18 (d, J = 8.4 Hz, 4H), 7.94 (d, J = 8.2 Hz, 6H), 7.63 – 7.59 (m, 4H), 7.49 (d, J = 8.7 Hz, 2H).

---

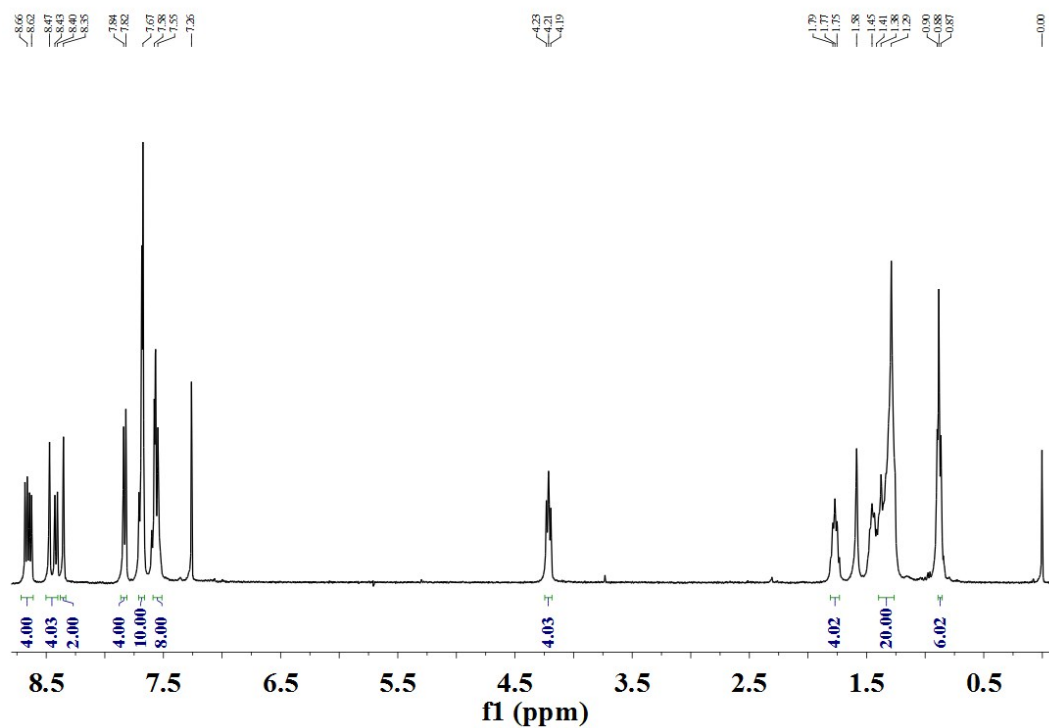

Figure S1. <sup>1</sup>H NMR spectra of DPHCANA.

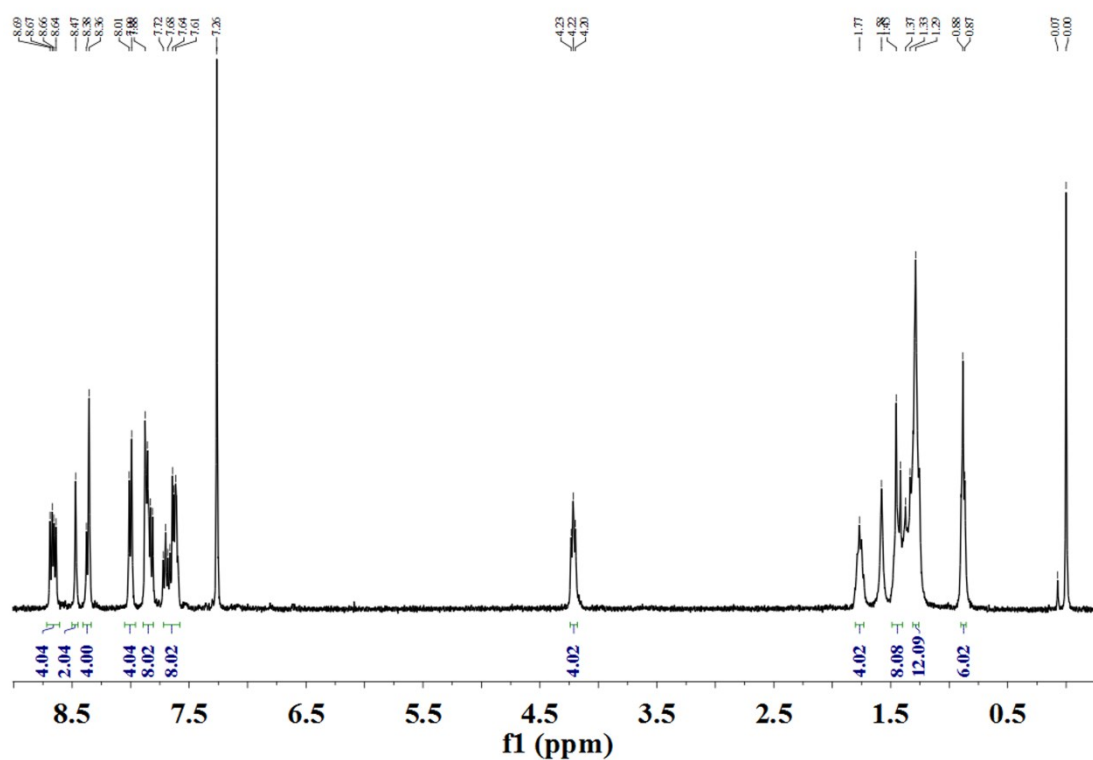

Figure S2. <sup>1</sup>H NMR spectra of DPCNCANA.

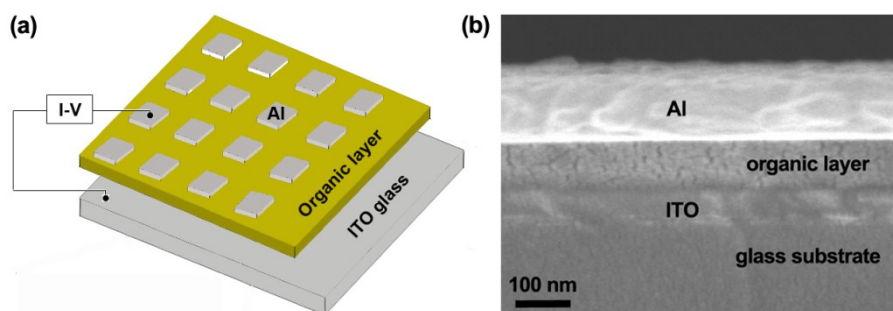

**Figure S3.** (a) The prototype of the sandwich-structured memory device; (b) SEM image of a cross section of the device.

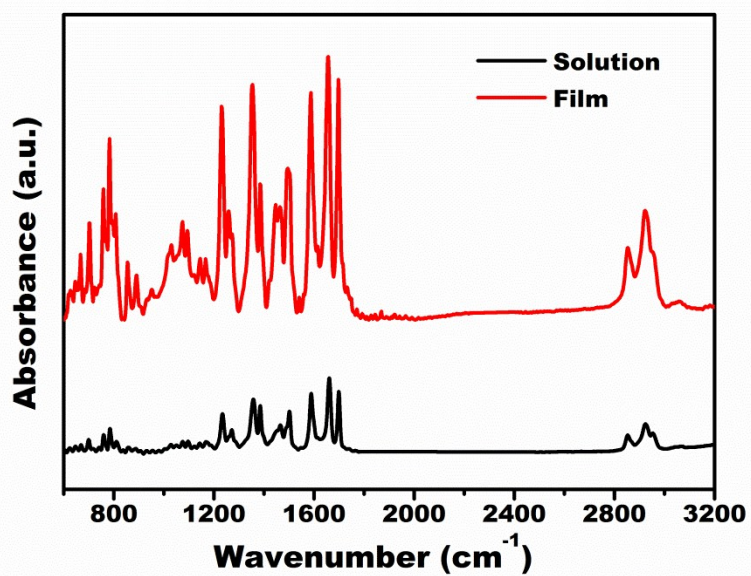

**Figure S4.** IR absorbance spectra of DPHCANA in solution and film states

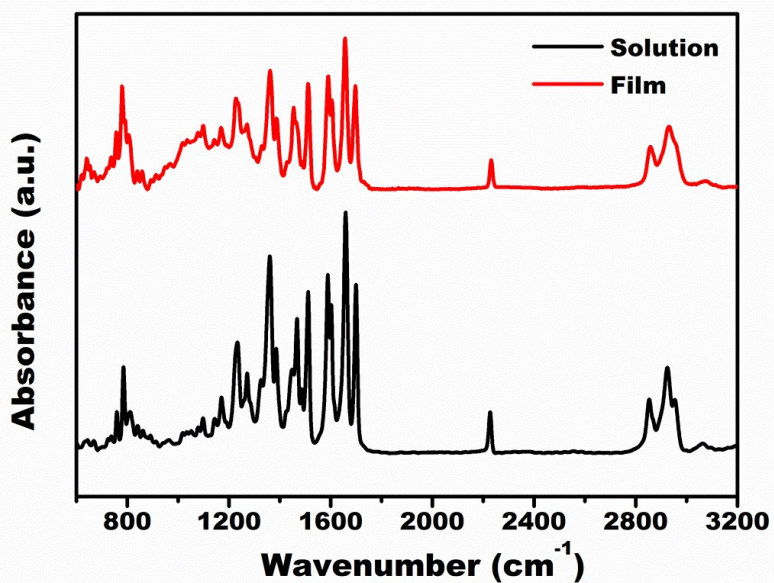

**Figure S5.** IR absorbance spectra of DPCNCANA in solution and film states

## References:

- 1 J. Q. Ding, B. H. Zhang, J. H. Lu, Z. Y. Xie, L. X. Wang, X. B. Jing and F. S. Wang, *Adv. Mater.*, 2009, **21**, 4983-4986.
  - 2 B. J. Song, H. M. Song, I. T. Choi, S. K. Kim, K. D. Seo, M. S. Kang, M. J. Lee, D. W. Cho, M. J. Ju and H. K. Kim, *Chem-Eur. J.*, 2011, **17**, 11115-11121.
  - 3 (a) G. Wang, S. F. Miao, Q. J. Zhang, H. F. Liu, H. Li, N. J. Li, Q. F. Xu, J. M. Lu and L. H. Wang, *Chem. Commun.*, 2013, **49**, 9470-9472. (b) M. Xu, J. M. Han, Y. Q. Zhang, X. M. Yang and L. Zang, *Chem. Commun.*, 2013, **49**, 11779-11781.
-
